# Supplementary material for: Veterinary teaching in COVID-19 times: perspectives of university teaching staff
Source: Frontiers journal article supplement (doi:10.3389/fvets.2024.1386978), 2024-06-27
Supplement: Data_Sheet_1.PDF [file Data_Sheet_1.PDF]

Dear professors,  
Dear lecturers and teaching staff,

We would like to ask you to take part in this survey to evaluate the summer semester 2020.

The current COVID-19 situation has presented new challenges this summer semester. Face-to-face teaching was quickly switched to a digital semester.

In order to learn as much as possible from this time for future online teaching at the TiHo and thus further optimize it, your experiences and opinions are needed.

The survey will take about 25-30 minutes.

The survey was created as part of my doctoral thesis in the field of educational research and will be analyzed afterwards. Your data will be stored anonymously.

It is best to complete the survey on a computer/laptop, as the presentation is optimized for this.

Thank you for your support,

Miriam Kanwischer  
Prof. Dr. Andrea Tipold, VPL

There are 27 questions in this survey.

## General personal details

Which gender do you identify with? \*

❗ Choose one of the following answers

Please choose **only one** of the following:

- ☐ Female
- ☐ Male
- ☐ Non-binary
- ☐ No answer

How old are you? \*

❗ Choose one of the following answers  
Please choose **only one** of the following:

- ☐ < 20
- ☐ 20
- ☐ 21
- ☐ 22
- ☐ 23
- ☐ 24
- ☐ 25
- ☐ 26
- ☐ 27
- ☐ 28
- ☐ 29
- ☐ 30
- ☐ 31
- ☐ 32
- ☐ 33
- ☐ 34
- ☐ 35
- ☐ 36
- ☐ 37
- ☐ 38
- ☐ 39
- ☐ 40
- ☐ 41
- ☐ 42
- ☐ 43
- ☐ 44
- ☐ 45
- ☐ 46
- ☐ 47
- ☐ 48
- ☐ 49
- ☐ 50
- ☐ 51
- ☐ 52
- ☐ 53
- ☐ 54
- ☐ 55
- ☐ 56
- ☐ 57
- ☐ 58
- ☐ 59
- ☐ 60
- ☐ 61

- ☐ 62
- ☐ 63
- ☐ 64
- ☐ 65
- ☐ 66
- ☐ 67
- ☐ 68
- ☐ 69
- ☐ 70
- ☐ 71
- ☐ 72
- ☐ 73
- ☐ 74
- ☐ 75
- ☐ 76
- ☐ 77
- ☐ 78
- ☐ 79
- ☐ 80
- ☐ > 80

Which respective subject area can your department be assigned to? \*

❗ Choose one of the following answers

Please choose **only one** of the following:

- ☐ Preliminary preclinical examination course (Vorphysikum)
- ☐ Intermediary preclinical examination course (Physikum)
- ☐ Clinical
- ☐ Paraclinical
- ☐ No answer

What position do you have at your institute? \*

❗ Choose one of the following answers

Please choose **only one** of the following:

- ☐ Institute/ Clinic director
- ☐ Working group leader
- ☐ Private lecturer
- ☐ Resident
- ☐ Assistant doctor
- ☐ Internship-Programm-Teilnehmende/r
- ☐ Research associates
- ☐ Other
- ☐ No answer

**❗ Choose one of the following answers**  
Please choose **only one** of the following:

- ☐ < 1 year
- ☐ 1-5 years
- ☐ 6-10 years
- ☐ > 10 years
- ☐ No answer

How often did you use the following digital courses as part of your teaching activities at the TiHo **BEFORE** the switch to the digital semester? \*

Please choose the appropriate response for each item:

[illegible]

What proved to be helpful in the **initial phase** of the semester? \*

Please choose the appropriate response for each item:

[illegible]



What additional technical equipment do you have? (multiple choice possible) \*

❗ Check all that apply

Please choose **all** that apply:

- ☐ Headphones
- ☐ Headset
- ☐ Webcam
- ☐ Microphone
- ☐ Speakers or integrated loudspeaker systems
- ☐ Printer
- ☐ Scanner
- ☐ External storage media
- ☐ No answer

☐ Other:

## Teaching in the digital semester

Please rate the following statements. \*

Please choose the appropriate response for each item:

|                                                                                                                          | <b>Strongly agree</b> | <b>Agree</b>          | <b>Disagree</b>       | <b>Strongly disagree</b> | <b>No answer</b>      |
|--------------------------------------------------------------------------------------------------------------------------|-----------------------|-----------------------|-----------------------|--------------------------|-----------------------|
| It was clear to me during the semester how the digital semester would work.                                              | <input type="radio"/> | <input type="radio"/> | <input type="radio"/> | <input type="radio"/>    | <input type="radio"/> |
| It is clear to me how things will continue until the end of the summer semester.                                         | <input type="radio"/> | <input type="radio"/> | <input type="radio"/> | <input type="radio"/>    | <input type="radio"/> |
| I communicated to the students how the digital semester would work.                                                      | <input type="radio"/> | <input type="radio"/> | <input type="radio"/> | <input type="radio"/>    | <input type="radio"/> |
| Digital competence in the team was conducive to implementing innovative solutions for digital teaching.                  | <input type="radio"/> | <input type="radio"/> | <input type="radio"/> | <input type="radio"/>    | <input type="radio"/> |
| I knew which platforms were available for my type of teaching.                                                           | <input type="radio"/> | <input type="radio"/> | <input type="radio"/> | <input type="radio"/>    | <input type="radio"/> |
| I always had contacts/support to help me digitize my teaching content in a meaningful way.                               | <input type="radio"/> | <input type="radio"/> | <input type="radio"/> | <input type="radio"/>    | <input type="radio"/> |
| The instructions and information material on how to digitize my teaching content were helpful.                           | <input type="radio"/> | <input type="radio"/> | <input type="radio"/> | <input type="radio"/>    | <input type="radio"/> |
| I was able to quickly become used to new systems.                                                                        | <input type="radio"/> | <input type="radio"/> | <input type="radio"/> | <input type="radio"/>    | <input type="radio"/> |
| My previous experience with similar systems helped me with the implementation of digital teaching.                       | <input type="radio"/> | <input type="radio"/> | <input type="radio"/> | <input type="radio"/>    | <input type="radio"/> |
| Digital teaching was able to meet my quality standards.                                                                  | <input type="radio"/> | <input type="radio"/> | <input type="radio"/> | <input type="radio"/>    | <input type="radio"/> |
| Digital teaching enabled me to offer interesting additional material for which there would otherwise have been no space. | <input type="radio"/> | <input type="radio"/> | <input type="radio"/> | <input type="radio"/>    | <input type="radio"/> |
| I had the feeling that the students were well versed in using the technology.                                            | <input type="radio"/> | <input type="radio"/> | <input type="radio"/> | <input type="radio"/>    | <input type="radio"/> |
| During synchronous teaching, I had the opportunity to get feedback from the participants.                                | <input type="radio"/> | <input type="radio"/> | <input type="radio"/> | <input type="radio"/>    | <input type="radio"/> |
| The collaboration with the students was constructive.                                                                    | <input type="radio"/> | <input type="radio"/> | <input type="radio"/> | <input type="radio"/>    | <input type="radio"/> |
| The students understood the situation and reacted flexibly.                                                              | <input type="radio"/> | <input type="radio"/> | <input type="radio"/> | <input type="radio"/>    | <input type="radio"/> |



Digital teaching currently takes place both synchronously in the form of live lectures and live question and answer sessions and asynchronously in the form of digital learning material, assignments, and learning control units. What is the best way for you to teach?

\*

❗ Choose one of the following answers  
Please choose **only one** of the following:

- ☐ Synchronous teaching
- ☐ Asynchronous teaching
- ☐ Combination of synchronous and asynchronous teaching
- ☐ I don't know

How often did you use the following digital teaching services as part of your teaching activities at the TiHo **DURING** the digital semester? \*

Please choose the appropriate response for each item:

[illegible]

In your opinion, what measures help students to process digital material promptly? \*

Please choose the appropriate response for each item:

|                                                                       | <b>Strongly agree</b> | <b>Agree</b>          | <b>Disagree</b>       | <b>Strongly disagree</b> | <b>No answer</b>      |
|-----------------------------------------------------------------------|-----------------------|-----------------------|-----------------------|--------------------------|-----------------------|
| <b>Learning instructions</b>                                          | <input type="radio"/> | <input type="radio"/> | <input type="radio"/> | <input type="radio"/>    | <input type="radio"/> |
| <b>Compulsory courses</b>                                             | <input type="radio"/> | <input type="radio"/> | <input type="radio"/> | <input type="radio"/>    | <input type="radio"/> |
| <b>Deadlines</b>                                                      | <input type="radio"/> | <input type="radio"/> | <input type="radio"/> | <input type="radio"/>    | <input type="radio"/> |
| <b>Assignment tasks</b>                                               | <input type="radio"/> | <input type="radio"/> | <input type="radio"/> | <input type="radio"/>    | <input type="radio"/> |
| <b>Learning control questions/<br/>quizzes</b>                        | <input type="radio"/> | <input type="radio"/> | <input type="radio"/> | <input type="radio"/>    | <input type="radio"/> |
| <b>Pretests (requirements to be able<br/>to view further content)</b> | <input type="radio"/> | <input type="radio"/> | <input type="radio"/> | <input type="radio"/>    | <input type="radio"/> |
| <b>Course attendance certificate</b>                                  | <input type="radio"/> | <input type="radio"/> | <input type="radio"/> | <input type="radio"/>    | <input type="radio"/> |
| <b>Q&amp;A sessions (e.g., via Microsoft<br/>Teams)</b>               | <input type="radio"/> | <input type="radio"/> | <input type="radio"/> | <input type="radio"/>    | <input type="radio"/> |
| <b>Exchange possibilities in the<br/>forum</b>                        | <input type="radio"/> | <input type="radio"/> | <input type="radio"/> | <input type="radio"/>    | <input type="radio"/> |
| <b>Progress indicator at TiHoMoodle<br/>(blue check mark)</b>         | <input type="radio"/> | <input type="radio"/> | <input type="radio"/> | <input type="radio"/>    | <input type="radio"/> |

How should lectures be recorded? \*

❶ Choose one of the following answers

Please choose **only one** of the following:

- ☐ As a whole
- ☐ In chapters
- ☐ No answer

When a lecture recording is divided into individual chapters, how long should the individual chapters be? \*

Only answer this question if the following conditions are met:

Answer was 'In chapters' at question '15 [e10]' (How should lectures be recorded?)

❗ Choose one of the following answers

Please choose **only one** of the following:

- ☐ 0-10 minutes
- ☐ 11-20 minutes
- ☐ 21-30 minutes
- ☐ 31-40 minutes
- ☐ 41-50 minutes
- ☐ 51-60 minutes
- ☐ 61-70 minutes
- ☐ 71-80 minutes
- ☐ 81-90 minutes
- ☐ No answer

## Effects of the digital semester on teaching

Has the switch to a digital semester generally had a negative impact on you? \*

❗ Choose one of the following answers

Please choose **only one** of the following:

- ☐ Yes
- ☐ No
- ☐ No answer

How does the time required for your digital teaching compare to conventional face-to-face courses with teaching materials (e.g. scripts)? \*

❗ Choose one of the following answers

Please choose **only one** of the following:

- ☐ The effort is higher
- ☐ The effort is the same
- ☐ The effort is lower
- ☐ No answer

Please evaluate the following statements on the learning behavior and active participation of students in the digital semester. \*

Please choose the appropriate response for each item:

|                                                                                                       | <b>Strongly agree</b> | <b>Agree</b>          | <b>Disagree</b>       | <b>Strongly disagree</b> | <b>No answer</b>      |
|-------------------------------------------------------------------------------------------------------|-----------------------|-----------------------|-----------------------|--------------------------|-----------------------|
| <b>Students were less reserved about asking questions.</b>                                            | <input type="radio"/> | <input type="radio"/> | <input type="radio"/> | <input type="radio"/>    | <input type="radio"/> |
| <b>The students participated more actively in the digital events compared to face-to-face events.</b> | <input type="radio"/> | <input type="radio"/> | <input type="radio"/> | <input type="radio"/>    | <input type="radio"/> |
| <b>Students only took part in courses that were compulsory.</b>                                       | <input type="radio"/> | <input type="radio"/> | <input type="radio"/> | <input type="radio"/>    | <input type="radio"/> |
| <b>More students took part in courses that were not compulsory compared to the analog semester.</b>   | <input type="radio"/> | <input type="radio"/> | <input type="radio"/> | <input type="radio"/>    | <input type="radio"/> |

Please rate the following statements about your flexibility | self-organization | resilience in the digital semester. \*

Please choose the appropriate response for each item:

|                                                                                       | Strongly agree        | Agree                 | Disagree              | Strongly disagree     | No answer             |
|---------------------------------------------------------------------------------------|-----------------------|-----------------------|-----------------------|-----------------------|-----------------------|
| The digital semester allows me to be more flexible in my teaching.                    | <input type="radio"/> | <input type="radio"/> | <input type="radio"/> | <input type="radio"/> | <input type="radio"/> |
| The increased flexibility improves my everyday life.                                  | <input type="radio"/> | <input type="radio"/> | <input type="radio"/> | <input type="radio"/> | <input type="radio"/> |
| I think the increased flexibility is positive in general.                             | <input type="radio"/> | <input type="radio"/> | <input type="radio"/> | <input type="radio"/> | <input type="radio"/> |
| I have more time.                                                                     | <input type="radio"/> | <input type="radio"/> | <input type="radio"/> | <input type="radio"/> | <input type="radio"/> |
| I have worked at other times of the day.                                              | <input type="radio"/> | <input type="radio"/> | <input type="radio"/> | <input type="radio"/> | <input type="radio"/> |
| Synchronous teaching has not changed my way of teaching.                              | <input type="radio"/> | <input type="radio"/> | <input type="radio"/> | <input type="radio"/> | <input type="radio"/> |
| Synchronous teaching has not changed my daily routine.                                | <input type="radio"/> | <input type="radio"/> | <input type="radio"/> | <input type="radio"/> | <input type="radio"/> |
| Asynchronous teaching has not changed my way of teaching.                             | <input type="radio"/> | <input type="radio"/> | <input type="radio"/> | <input type="radio"/> | <input type="radio"/> |
| Asynchronous teaching has not changed my daily routine.                               | <input type="radio"/> | <input type="radio"/> | <input type="radio"/> | <input type="radio"/> | <input type="radio"/> |
| I've reorganized my teaching because of the digital semester.                         | <input type="radio"/> | <input type="radio"/> | <input type="radio"/> | <input type="radio"/> | <input type="radio"/> |
| Due to the digital semester, my teaching has become more problem-oriented.            | <input type="radio"/> | <input type="radio"/> | <input type="radio"/> | <input type="radio"/> | <input type="radio"/> |
| The intensive work at the computer screen has challenged me.                          | <input type="radio"/> | <input type="radio"/> | <input type="radio"/> | <input type="radio"/> | <input type="radio"/> |
| I was able to digitize my teaching content using existing hardware (PC, notebook).    | <input type="radio"/> | <input type="radio"/> | <input type="radio"/> | <input type="radio"/> | <input type="radio"/> |
| I have a workstation at my disposal where I can concentrate on my work.               | <input type="radio"/> | <input type="radio"/> | <input type="radio"/> | <input type="radio"/> | <input type="radio"/> |
| I feel less stressed overall.                                                         | <input type="radio"/> | <input type="radio"/> | <input type="radio"/> | <input type="radio"/> | <input type="radio"/> |
| I like the fact that I can make lecture recordings and videos available for revision. | <input type="radio"/> | <input type="radio"/> | <input type="radio"/> | <input type="radio"/> | <input type="radio"/> |
| I see the digital semester as a personal challenge.                                   | <input type="radio"/> | <input type="radio"/> | <input type="radio"/> | <input type="radio"/> | <input type="radio"/> |
| I miss the direct contact with the students.                                          | <input type="radio"/> | <input type="radio"/> | <input type="radio"/> | <input type="radio"/> | <input type="radio"/> |
| I find it difficult to teach with digital teaching materials.                         | <input type="radio"/> | <input type="radio"/> | <input type="radio"/> | <input type="radio"/> | <input type="radio"/> |

|                                                                                          | Strongly agree        | Agree                 | Disagree              | Strongly disagree     | No answer             |
|------------------------------------------------------------------------------------------|-----------------------|-----------------------|-----------------------|-----------------------|-----------------------|
| I'll be happy when my course is back to how it was before Corona.                        | <input type="radio"/> | <input type="radio"/> | <input type="radio"/> | <input type="radio"/> | <input type="radio"/> |
| I have not developed a routine for the online semester.                                  | <input type="radio"/> | <input type="radio"/> | <input type="radio"/> | <input type="radio"/> | <input type="radio"/> |
| I had difficulties organizing private care tasks (e.g. childcare, caring for relatives). | <input type="radio"/> | <input type="radio"/> | <input type="radio"/> | <input type="radio"/> | <input type="radio"/> |

Have you encountered any other challenges this semester? \*

❗ Choose one of the following answers

Please choose **only one** of the following:

☐ No

☐ No answer

☐ Other

## Outlook and general suggestions

Where do you see room for improvement with regard to digital teaching? \*

Please choose the appropriate response for each item:

|                                          | Strongly agree        | Agree                 | Disagree              | Strongly disagree     | No answer             |
|------------------------------------------|-----------------------|-----------------------|-----------------------|-----------------------|-----------------------|
| Technical equipment at the TiHo          | <input type="radio"/> | <input type="radio"/> | <input type="radio"/> | <input type="radio"/> | <input type="radio"/> |
| Own technical equipment                  | <input type="radio"/> | <input type="radio"/> | <input type="radio"/> | <input type="radio"/> | <input type="radio"/> |
| Training of lecturers on online teaching | <input type="radio"/> | <input type="radio"/> | <input type="radio"/> | <input type="radio"/> | <input type="radio"/> |
| Training of students on online teaching  | <input type="radio"/> | <input type="radio"/> | <input type="radio"/> | <input type="radio"/> | <input type="radio"/> |
| Findability of instructions              | <input type="radio"/> | <input type="radio"/> | <input type="radio"/> | <input type="radio"/> | <input type="radio"/> |
| More interactive courses                 | <input type="radio"/> | <input type="radio"/> | <input type="radio"/> | <input type="radio"/> | <input type="radio"/> |

Would you welcome the sustainability of the following systems (after coronavirus)?", \*

Please choose the appropriate response for each item:

|                        | <b>Strongly agree</b> | <b>Agree</b>          | <b>Disagree</b>       | <b>Strongly disagree</b> | <b>No answer</b>      |
|------------------------|-----------------------|-----------------------|-----------------------|--------------------------|-----------------------|
| <b>Microsoft Teams</b> | <input type="radio"/> | <input type="radio"/> | <input type="radio"/> | <input type="radio"/>    | <input type="radio"/> |
| <b>TiHoMoodle</b>      | <input type="radio"/> | <input type="radio"/> | <input type="radio"/> | <input type="radio"/>    | <input type="radio"/> |

Which teaching method do you see the greatest potential in the future? \*

Please choose the appropriate response for each item:

|                                                                                                               | <b>Strongly agree</b> | <b>Agree</b>          | <b>Disagree</b>       | <b>Strongly disagree</b> | <b>No answer</b>      |
|---------------------------------------------------------------------------------------------------------------|-----------------------|-----------------------|-----------------------|--------------------------|-----------------------|
| <b>Digital live events, e.g., via Microsoft Teams (synchronous)</b>                                           | <input type="radio"/> | <input type="radio"/> | <input type="radio"/> | <input type="radio"/>    | <input type="radio"/> |
| <b>Blended learning*</b>                                                                                      | <input type="radio"/> | <input type="radio"/> | <input type="radio"/> | <input type="radio"/>    | <input type="radio"/> |
| <b>Flipped/inverted classroom**</b>                                                                           | <input type="radio"/> | <input type="radio"/> | <input type="radio"/> | <input type="radio"/>    | <input type="radio"/> |
| <b>Asynchronous online teaching (e.g., presentation recordings, exercises in TiHoMoodle, teaching videos)</b> | <input type="radio"/> | <input type="radio"/> | <input type="radio"/> | <input type="radio"/>    | <input type="radio"/> |
| <b>Both synchronous and asynchronous online teaching</b>                                                      | <input type="radio"/> | <input type="radio"/> | <input type="radio"/> | <input type="radio"/>    | <input type="radio"/> |

\* Combination of classroom teaching and online units.

\*\* Combination of initial preparation of learning content (e.g., watching lecture recordings), and subsequent discussion of questions.

What did you particularly like in this digital semester?

Please write your answer here:



Do you have any suggestions for improving digital teaching?

Please write your answer here:

What technology/software did you miss for teaching digital courses in the summer semester 2020?

Please write your answer here:

Thank you for taking the time to answer this questionnaire!

Contact for further questions:

Miriam Kanwischer

ZELDA -E-Learning Service

Bünteweg 11, 30559 Hanover

Miriam.Kanwischer@tiho-hannover.de

08-14-2020 – 10:06

Submit your survey.

Thank you for completing this survey.
